# Supplementary material for: GOLT1B Activation in Hepatitis C Virus-Infected Hepatocytes Links ER Trafficking and Viral Replication
Source: MDPI journal article supplement (doi:10.3390/pathogens11010046), 2021-12-31
Supplement: s1 [file s1]

## Supplementary figure S1

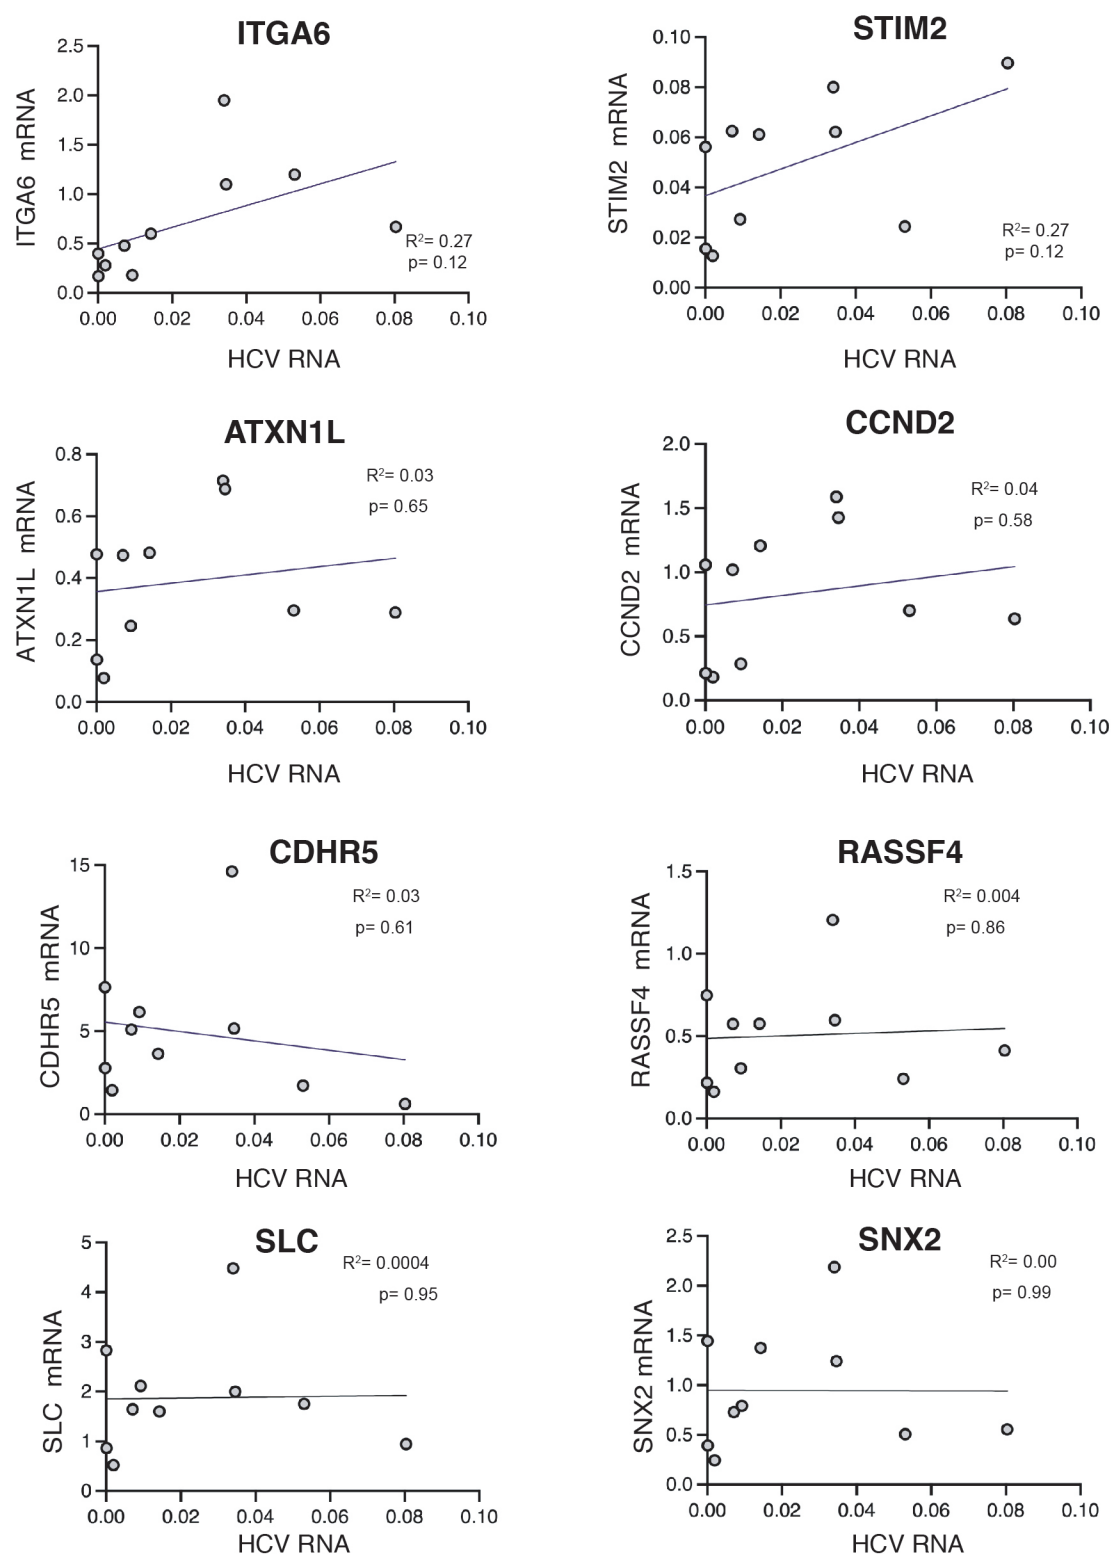

**Figure S1: Correlations of HCV RNA levels and eight target genes in non-tumoral regions of HCC patients.** mRNA levels of the 8 indicated genes were quantified by qPCR in non tumoral and tumoral samples from ten patients with HCC of HCV etiology. The two genes with positive correlations (CLOCK and GOLT1B) are shown in Figure 4A. The R-squared and p-values from Pearson correlation tests (two-tailed) are indicated.

# Supplementary figure S2

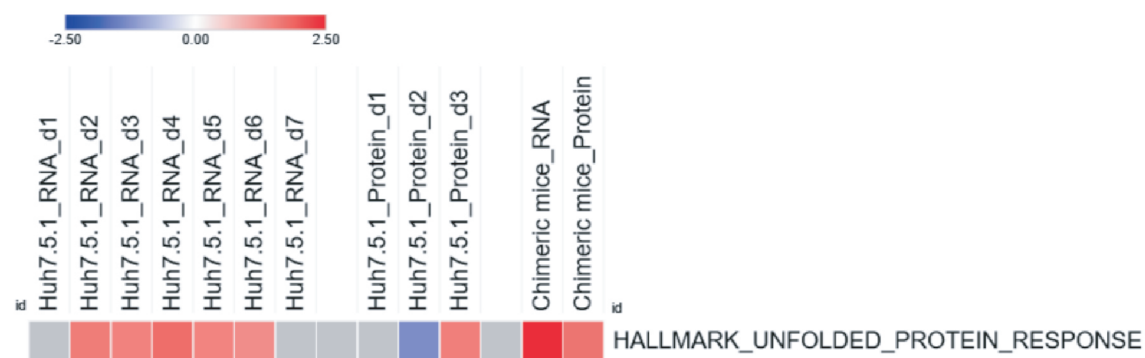

**Figure S2: HCV infection induces an unfolded protein response in Huh7.5.1 and human liver chimeric mice.** Gene set enrichment analysis (GSEA) of RNA-seq and proteomic data of HCV-infection time course of quiescent Huh7.5.1 (Huh7.5.1dif) relative to mock-infected cells (n=2) and from HCV-infected human liver chimeric mice from [10]. Significant changes of the normalized enrichment scores (NES) are indicated in color. The statistical cutoff for GSEA of liver tissues was a false discovery rate of  $Q < 0.05$  and for Huh7.5.1dif was  $P < 0.005$ . Enrichment (upregulation)=red, negative enrichment (downregulation)=blue. The Hallmark gene set have been obtained from the Molecular Signature Database [38].

# Supplementary Table S1

3' sequence complementary to the secondary detection probe (FLAP-Cy3) : TTACACTCGGACCTCGTCGACATGCATT  
 FLAP-Y Cy3: /5Cy3/AA TGC ATG TCG ACG AGG TCC GAG TGT AA/3Cy3Sp/

| Sequence Name | Sequence                                                   |
|---------------|------------------------------------------------------------|
| Y-HCV-1b-1    | GGCACGGGGAGACAGGCTGTGATATATTACACTCGGACCTCGTCGACATGCATT     |
| Y-HCV-1b-2    | GGGACAGTAGCTTAGCGCGGACACTTTTACACTCGGACCTCGTCGACATGCATT     |
| Y-HCV-1b-3    | ATGTCTCCAGCTCGCAAGGGTGGTATTACACTCGGACCTCGTCGACATGCATT      |
| Y-HCV-1b-4    | CCAAGTTTCCGTAGCGACTGAAGCCACTTACACTCGGACCTCGTCGACATGCATT    |
| Y-HCV-1b-5    | GATCTGAGGTAGGTCAAGTGGCTCAATGTTACACTCGGACCTCGTCGACATGCATT   |
| Y-HCV-1b-6    | CCCATAAAGGTGGGCGCATACATGATGTTACACTCGGACCTCGTCGACATGCATT    |
| Y-HCV-1b-7    | GCCGCAGAGGCCCTTCAAGTAACATGTTTACACTCGGACCTCGTCGACATGCATT    |
| Y-HCV-1b-8    | GGTATTACCGCAGCTAGTCGTCAGCATTACACTCGGACCTCGTCGACATGCATT     |
| Y-HCV-1b-9    | CGATAACCGCAGTTCTGCCCCTTTGAATTACACTCGGACCTCGTCGACATGCATT    |
| Y-HCV-1b-10   | CCGATATAAAGCCGCTCTGTGAGCGATTACACTCGGACCTCGTCGACATGCATT     |
| Y-HCV-1b-11   | CTTCGGGGGCCAAGTCACAACATTGGTTACACTCGGACCTCGTCGACATGCATT     |
| Y-HCV-1b-12   | TTGATTTCCAGGCATTCACCAGGAACCTTACACTCGGACCTCGTCGACATGCATT    |
| Y-HCV-1b-13   | CCGCTGTCCAGGAGTACTGGAATCTTACACTCGGACCTCGTCGACATGCATT       |
| Y-HCV-1b-14   | ACGTCGTAAAGGGCCATTTTCTCGCACTTACACTCGGACCTCGTCGACATGCATT    |
| Y-HCV-1b-15   | TGTGGTGACGCAGCAAAGAGTTGCTCATTACACTCGGACCTCGTCGACATGCATT    |
| Y-HCV-1b-16   | TGGGAGCTGTGACCCAACCAGGTATTTTACACTCGGACCTCGTCGACATGCATT     |
| Y-HCV-1b-17   | GAATGTGACCTCTCCCGTAGGAGAGTTACACTCGGACCTCGTCGACATGCATT      |
| Y-HCV-1b-18   | CCAACGATCCTCATGGAACCGTTTTTGATTACACTCGGACCTCGTCGACATGCATT   |
| Y-HCV-1b-19   | TCAGTCAACACCGTGCATATCCAGTCTTACACTCGGACCTCGTCGACATGCATT     |
| Y-HCV-1b-20   | GCATGGCGTGGAGCAGTCCTCATTAAATTACACTCGGACCTCGTCGACATGCATT    |
| Y-HCV-1b-21   | GTGGAGCCTTTCACAACAGCTGATTACACTCGGACCTCGTCGACATGCATT        |
| Y-HCV-1b-22   | CGAAGCGAACCCTATCAGCCGGTTCATTACACTCGGACCTCGTCGACATGCATT     |
| Y-HCV-1b-23   | CGCTCATGACCTTAAAGGCCACGAGTTTACACTCGGACCTCGTCGACATGCATT     |
| Y-HCV-1b-24   | TAGAGGCTGTGAATGCCATCAGTGATGTTACACTCGGACCTCGTCGACATGCATT    |
| Y-HCV-1b-25   | TGCTAAGTACTGTATCCCCTGATGAATTACACTCGGACCTCGTCGACATGCATT     |
| Y-HCV-1b-26   | CATGTGCTTCGCCCAGAAGGTCTCAATTACACTCGGACCTCGTCGACATGCATT     |
| Y-HCV-1b-27   | TGTTGTCAAGCAATACGCGGCCAGAGTTACACTCGGACCTCGTCGACATGCATT     |
| Y-HCV-1b-28   | GCCGACATGCATGCCATGATGATTTTACACTCGGACCTCGTCGACATGCATT       |
| Y-HCV-1b-29   | ACACTTCCACATTTGATCCCACGATGTTACACTCGGACCTCGTCGACATGCATT     |
| Y-HCV-1b-30   | GCAGACGGGCAACCTTGGTGTATTTATTACACTCGGACCTCGTCGACATGCATT     |
| Y-HCV-1b-31   | GAGGGCCGTTCTCTGGAGTACAAATTACACTCGGACCTCGTCGACATGCATT       |
| Y-HCV-1b-32   | TAGGGTCCAAGCTGAAATCGACTGTCTTTACACTCGGACCTCGTCGACATGCATT    |
| Y-HCV-1b-33   | CGCTGGTCCGTATGACGGACACATCATTACACTCGGACCTCGTCGACATGCATT     |
| Y-HCV-1b-34   | CCATAGAAGGGGATCTCTCCAGTGTGTTACACTCGGACCTCGTCGACATGCATT     |
| Y-HCV-1b-35   | TGCCGATGCCCCAAGATGGTAGTCGAGTTACACTCGGACCTCGTCGACATGCATT    |
| Y-HCV-1b-36   | TAGGGTCGACACCATGTGCCTTAGACTTACACTCGGACCTCGTCGACATGCATT     |
| Y-HCV-1b-37   | CGGGGACCGCATAGTAGTTTCCATAGATTACACTCGGACCTCGTCGACATGCATT    |
| Y-HCV-1b-38   | CAACGGGTACAAAGTCCACCGCCTTCTTACACTCGGACCTCGTCGACATGCATT     |
| Y-HCV-1b-39   | GTTGACGCAGGTCGCCAGGAAAGATTGTTTACACTCGGACCTCGTCGACATGCATT   |
| Y-HCV-1b-40   | CTGTGAGGCTAGTGATGATGACGCCATTACACTCGGACCTCGTCGACATGCATT     |
| Y-HCV-1b-41   | TTCAAGACTATCGGCGGTCCAGAATTACACTCGGACCTCGTCGACATGCATT       |
| Y-HCV-1b-42   | TAAACGTACGTACCTGTCAAGTGGGCTTACACTCGGACCTCGTCGACATGCATT     |
| Y-HCV-1b-43   | CGCGCACGAAGTACGGCACTCTAGTTTTACACTCGGACCTCGTCGACATGCATT     |
| Y-HCV-1b-44   | CGCATTGAGGACCACCAGGTTCTCTATTACACTCGGACCTCGTCGACATGCATT     |
| Y-HCV-1b-45   | CGCTGACCCCTATACCGTACAGGATTTTACACTCGGACCTCGTCGACATGCATT     |
| Y-HCV-1b-46   | ACGTCCACGATGTTCTGATGGAGATGGTTACACTCGGACCTCGTCGACATGCATT    |
| Y-HCV-1b-47   | TGTTGTAGACAGCAGCAGCGGGCTAATTACACTCGGACCTCGTCGACATGCATT     |
| Y-HCV-1b-48   | GTAAAGTTGACAGTGACAGGGGTAGTGCCATTACACTCGGACCTCGTCGACATGCATT |
| Y-HCV-1b-49   | CTGTATGGGTAGTCAACCATGCACCTTACACTCGGACCTCGTCGACATGCATT      |
| Y-HCV-1b-50   | CATGTACAGCCGAACCAAGTGGCTTGTACACTCGGACCTCGTCGACATGCATT      |
| Y-HCV-1b-51   | TGAGCGAACTTGTCAATGGGGCGGCATTACACTCGGACCTCGTCGACATGCATT     |
| Y-HCV-1b-52   | ACCCAGTGTGGAGGGAGTCATTGCAGTTACACTCGGACCTCGTCGACATGCATT     |
| Y-HCV-1b-53   | CACGACAGCTTGTGGGATCCGGAGTAATTACACTCGGACCTCGTCGACATGCATT    |
| Y-HCV-1b-54   | GTGACCTGATACGTGGCCGGGATAGATTACACTCGGACCTCGTCGACATGCATT     |
| Y-HCV-1b-55   | GCTGCCTCATACACAATGCTTGAGTTTTACACTCGGACCTCGTCGACATGCATT     |
| Y-HCV-1b-56   | AGCAGTCGTTCTGTGACATGGTACACCTTACACTCGGACCTCGTCGACATGCATT    |
| Y-HCV-1b-57   | GGACACGTTGCGCACTTCAATAAGCGGTTACACTCGGACCTCGTCGACATGCATT    |
| Y-HCV-1b-58   | GCGAAGCCGCATGTGAGGATTCGATTTACACTCGGACCTCGTCGACATGCATT      |
| Y-HCV-1b-59   | TCATTGCCATAGAGGGGCAAGGGTATTACACTCGGACCTCGTCGACATGCATT      |
| Y-HCV-1b-60   | CTATCAGGCAGTACCACAAGGCCGTTTTACACTCGGACCTCGTCGACATGCATT     |
| Y-HCV-1b-61   | CAAATCTCCAGGCATTGAGCGGGGTTTTACACTCGGACCTCGTCGACATGCATT     |

## Supplementary Table S2

### Up-regulated genes in HCV positive tumor cells

n=98

p-value <0.05 LogFoldChange >2

| Gene id    | baseMeanA | baseMeanB | foldChange | log2FoldChange | pval  |
|------------|-----------|-----------|------------|----------------|-------|
| STPG1      | 0         | 109       | Inf        | Inf            | 0.041 |
| CCDC28B    | 0         | 111       | Inf        | Inf            | 0.036 |
| SPAG17     | 0         | 133       | Inf        | Inf            | 0.021 |
| ZNF687-AS1 | 0         | 145       | Inf        | Inf            | 0.012 |
| RAD51AP2   | 0         | 132       | Inf        | Inf            | 0.024 |
| STXBP5-AS1 | 0         | 147       | Inf        | Inf            | 0.011 |
| EXTL3      | 0         | 307       | Inf        | Inf            | 0.005 |
| LOC392232  | 0         | 184       | Inf        | Inf            | 0.006 |
| FAM238B    | 0         | 118       | Inf        | Inf            | 0.036 |
| ZFPL1      | 0         | 110       | Inf        | Inf            | 0.037 |
| FAM230C    | 0         | 140       | Inf        | Inf            | 0.017 |
| LINC01055  | 0         | 283       | Inf        | Inf            | 0.031 |
| GPR137C    | 0         | 148       | Inf        | Inf            | 0.037 |
| RRN3P2     | 0         | 298       | Inf        | Inf            | 0     |
| MYH13      | 0         | 208       | Inf        | Inf            | 0.002 |
| ENDOV      | 0         | 306       | Inf        | Inf            | 0.029 |
| EFCAB6     | 0         | 317       | Inf        | Inf            | 0.014 |
| LINC00967  | 2         | 179       | 97.25      | 6.6            | 0.03  |
| SPACA9     | 40        | 393       | 9.94       | 3.31           | 0.018 |
| GEN1       | 49        | 478       | 9.73       | 3.28           | 0.036 |
| KLHL25     | 3         | 212       | 84.01      | 6.39           | 0.033 |
| TLR1       | 4         | 333       | 81.54      | 6.35           | 0.045 |
| RMI1       | 42        | 361       | 8.51       | 3.09           | 0.032 |
| SHCBP1     | 27        | 221       | 8.3        | 3.05           | 0.049 |
| OFD1       | 69        | 569       | 8.29       | 3.05           | 0.015 |
| ZNF337     | 3         | 215       | 78.43      | 6.29           | 0.036 |
| PLCL1      | 1         | 398       | 727.15     | 9.51           | 0.005 |
| LINC01359  | 0         | 269       | 701.37     | 9.45           | 0.029 |
| ADIPOR2    | 88        | 657       | 7.48       | 2.9            | 0.016 |
| HEG1       | 77        | 553       | 7.21       | 2.85           | 0.023 |
| MGAT4C     | 193       | 1368      | 7.08       | 2.82           | 0.018 |
| LRRC45     | 5         | 340       | 69.5       | 6.12           | 0.005 |
| VSX1       | 3         | 199       | 62.7       | 5.97           | 0.024 |
| ZNF562     | 164       | 1147      | 6.99       | 2.81           | 0     |
| OPHN1      | 131       | 842       | 6.41       | 2.68           | 0     |
| DNAJC18    | 73        | 448       | 6.14       | 2.62           | 0.041 |
| SUZ12      | 141       | 857       | 6.07       | 2.6            | 0.02  |
| ZNF202     | 4         | 205       | 57.59      | 5.85           | 0.03  |
| IL17RD     | 6         | 331       | 56.48      | 5.82           | 0.002 |
| CYTH3      | 4         | 239       | 53.85      | 5.75           | 0.019 |
| LINC00368  | 67        | 396       | 5.92       | 2.57           | 0.012 |
| PPARG      | 83        | 469       | 5.62       | 2.49           | 0.041 |
| ARSD       | 178       | 985       | 5.54       | 2.47           | 0.021 |
| GGT6       | 67        | 353       | 5.28       | 2.4            | 0.027 |
| PLA2G2A    | 270       | 1386      | 5.14       | 2.36           | 0.011 |
| THRIL      | 1         | 268       | 486.91     | 8.93           | 0.007 |
| SIPA1      | 7         | 326       | 45.79      | 5.52           | 0.033 |
| MSANTD4    | 5         | 239       | 44.48      | 5.47           | 0.049 |
| STK33      | 0         | 142       | 433.31     | 8.76           | 0.039 |
| ZBTB3      | 6         | 259       | 43.48      | 5.44           | 0.029 |
| AFAP1-AS1  | 0         | 163       | 422.31     | 8.72           | 0.017 |
| CCT6B      | 8         | 326       | 41.96      | 5.39           | 0.007 |
| UNC119B    | 7         | 273       | 41.87      | 5.39           | 0.02  |
| RHNO1      | 9         | 373       | 40.94      | 5.36           | 0.008 |
| DNPEP      | 119       | 583       | 4.9        | 2.29           | 0.012 |

|              |     |      |         |       |       |
|--------------|-----|------|---------|-------|-------|
| GRPR         | 174 | 829  | 4.75    | 2.25  | 0.044 |
| KANSL1L      | 238 | 1112 | 4.68    | 2.23  | 0.047 |
| PLEKHJ1      | 69  | 318  | 4.59    | 2.2   | 0.047 |
| ZNF37A       | 202 | 846  | 4.18    | 2.06  | 0.019 |
| NUP88        | 189 | 791  | 4.18    | 2.06  | 0.042 |
| XPNPEP1      | 18  | 719  | 39.43   | 5.3   | 0.001 |
| CDC42EP1     | 0   | 159  | 358.47  | 8.49  | 0.02  |
| ZSCAN5A      | 0   | 156  | 350.55  | 8.45  | 0.027 |
| IL12RB2      | 9   | 307  | 35.05   | 5.13  | 0.017 |
| DMTN         | 0   | 153  | 349.6   | 8.45  | 0.032 |
| NEK5         | 9   | 325  | 34.28   | 5.1   | 0.021 |
| BCAS1        | 8   | 279  | 33.27   | 5.06  | 0.03  |
| ORC1         | 9   | 302  | 32.99   | 5.04  | 0.043 |
| ZFP82        | 11  | 355  | 31.51   | 4.98  | 0.029 |
| NISCH        | 19  | 597  | 30.89   | 4.95  | 0.01  |
| TBC1D27P     | 1   | 228  | 287.32  | 8.17  | 0.02  |
| TEX14        | 1   | 228  | 286.65  | 8.16  | 0.002 |
| LOC105372582 | 1   | 393  | 281.24  | 8.14  | 0.005 |
| THUMPD2      | 1   | 345  | 262.09  | 8.03  | 0.016 |
| TMEM189      | 1   | 207  | 259.75  | 8.02  | 0.005 |
| NR3C2        | 12  | 289  | 24.68   | 4.63  | 0.032 |
| STAT5A       | 11  | 261  | 23.68   | 4.57  | 0.016 |
| AQP11        | 14  | 324  | 23.49   | 4.55  | 0.042 |
| EPB41L3      | 1   | 306  | 227.55  | 7.83  | 0.001 |
| BTBD2        | 20  | 455  | 22.62   | 4.5   | 0.003 |
| FUT1         | 1   | 218  | 203.98  | 7.67  | 0.012 |
| CLN6         | 16  | 330  | 20.81   | 4.38  | 0.042 |
| TMA16        | 1   | 215  | 190.89  | 7.58  | 0.016 |
| TDRD6        | 18  | 351  | 19.57   | 4.29  | 0.041 |
| PPTC7        | 28  | 464  | 16.71   | 4.06  | 0.018 |
| SPEF2        | 2   | 370  | 155.08  | 7.28  | 0.01  |
| MKNK1-AS1    | 0   | 169  | 1543.4  | 10.59 | 0.012 |
| HSPA2        | 2   | 371  | 152.05  | 7.25  | 0.03  |
| GUCY1B1      | 0   | 152  | 1386    | 10.44 | 0.034 |
| CMC4         | 2   | 244  | 130.85  | 7.03  | 0.015 |
| LINC02532    | 0   | 141  | 1288.08 | 10.33 | 0.024 |
| ZNF532       | 28  | 345  | 12.32   | 3.62  | 0.038 |
| VRK2         | 74  | 865  | 11.69   | 3.55  | 0.002 |
| PLOD3        | 43  | 482  | 11.11   | 3.47  | 0.024 |
| FOXL2NB      | 26  | 292  | 11.08   | 3.47  | 0.025 |
| ZFP64        | 2   | 205  | 106.71  | 6.74  | 0.011 |
| EBF1         | 2   | 237  | 105.41  | 6.72  | 0.022 |
| LOC101928336 | 31  | 329  | 10.78   | 3.43  | 0.043 |

#### Down-regulated genes in HCV positive tumor cells

| n=159        | p-value <0.05 |           | LogFoldChange >2 |                |       |
|--------------|---------------|-----------|------------------|----------------|-------|
| Gene id      | baseMeanA     | baseMeanB | foldChange       | log2FoldChange | pval  |
| MAP3K6       | 95            | 0         | 0                | inf            | 0.042 |
| LOC100507634 | 119           | 0         | 0                | inf            | 0.023 |
| PRRX1        | 137           | 0         | 0                | inf            | 0.01  |
| TAF1A-AS1    | 87            | 0         | 0                | inf            | 0.046 |
| CYP26B1      | 155           | 0         | 0                | inf            | 0.004 |
| ARHGAP15     | 93            | 0         | 0                | inf            | 0.033 |
| C2CD6        | 216           | 0         | 0                | inf            | 0.001 |
| SS18L2       | 139           | 0         | 0                | inf            | 0.007 |
| EXOSC7       | 220           | 0         | 0                | inf            | 0     |
| MIR1284      | 94            | 0         | 0                | inf            | 0.036 |
| TACC3        | 92            | 0         | 0                | inf            | 0.035 |
| KIT          | 171           | 0         | 0                | inf            | 0.02  |

|              |     |   |      |        |       |
|--------------|-----|---|------|--------|-------|
| C4orf46      | 122 | 0 | 0    | inf    | 0.014 |
| ESM1         | 89  | 0 | 0    | inf    | 0.049 |
| SHLD3        | 108 | 0 | 0    | inf    | 0.02  |
| C5orf30      | 153 | 0 | 0    | inf    | 0.011 |
| TRIM39       | 80  | 0 | 0    | inf    | 0.05  |
| FAM221A      | 97  | 0 | 0    | inf    | 0.028 |
| LAT2         | 110 | 0 | 0    | inf    | 0.026 |
| SNX16        | 178 | 0 | 0    | inf    | 0.002 |
| TSPYL2       | 126 | 0 | 0    | inf    | 0.009 |
| TBX22        | 126 | 0 | 0    | inf    | 0.047 |
| LINC00894    | 96  | 0 | 0    | inf    | 0.041 |
| HKDC1        | 139 | 0 | 0    | inf    | 0.007 |
| LOC100506606 | 104 | 0 | 0    | inf    | 0.023 |
| PCDH17       | 134 | 0 | 0    | inf    | 0.01  |
| TMEM255B     | 112 | 0 | 0    | inf    | 0.042 |
| AVEN         | 100 | 0 | 0    | inf    | 0.026 |
| PRC1         | 157 | 0 | 0    | inf    | 0.004 |
| FLYWCH1      | 107 | 0 | 0    | inf    | 0.036 |
| LINC01290    | 184 | 0 | 0    | inf    | 0.004 |
| ACSF3        | 114 | 0 | 0    | inf    | 0.015 |
| TLCD1        | 127 | 0 | 0    | inf    | 0.011 |
| ABI3         | 111 | 0 | 0    | inf    | 0.027 |
| PPM1E        | 168 | 0 | 0    | inf    | 0.005 |
| VAV1         | 99  | 0 | 0    | inf    | 0.026 |
| SHKBP1       | 138 | 0 | 0    | inf    | 0.008 |
| PIH1D1       | 96  | 0 | 0    | inf    | 0.035 |
| ZNF649       | 111 | 0 | 0    | inf    | 0.033 |
| ZNF71        | 89  | 0 | 0    | inf    | 0.046 |
| SLPI         | 87  | 0 | 0    | inf    | 0.042 |
| SAYSD1       | 260 | 0 | 0    | -10.45 | 0     |
| LY96         | 217 | 0 | 0    | -10.19 | 0.001 |
| SNORA12      | 215 | 0 | 0    | -10.18 | 0.004 |
| ATG10        | 261 | 0 | 0    | -9.71  | 0     |
| PIK3C2G      | 155 | 0 | 0    | -9.7   | 0.036 |
| MS4A4A       | 132 | 0 | 0    | -9.47  | 0.013 |
| TRAF3IP3     | 119 | 0 | 0    | -9.4   | 0.036 |
| HMG5         | 229 | 0 | 0    | -9.34  | 0.005 |
| ZNF354A      | 173 | 0 | 0    | -9.11  | 0.025 |
| BICC1        | 168 | 0 | 0    | -9.07  | 0.006 |
| CD3E         | 143 | 0 | 0    | -8.84  | 0.02  |
| PHTF1        | 168 | 0 | 0    | -8.83  | 0.007 |
| ZEB1-AS1     | 134 | 0 | 0    | -8.57  | 0.019 |
| MCM10        | 118 | 0 | 0    | -8.31  | 0.042 |
| ANAPC2       | 284 | 1 | 0    | -8.07  | 0.005 |
| GALK1        | 139 | 1 | 0    | -8.04  | 0.027 |
| CD274        | 189 | 1 | 0    | -7.99  | 0.014 |
| GOLGA6L10    | 176 | 1 | 0    | -7.97  | 0.018 |
| LINC01923    | 155 | 1 | 0    | -7.95  | 0.03  |
| NLGN4Y       | 180 | 1 | 0    | -7.93  | 0.012 |
| HDAC3        | 163 | 1 | 0    | -7.78  | 0.018 |
| SNORA53      | 145 | 1 | 0    | -7.68  | 0.02  |
| GABRP        | 118 | 1 | 0.01 | -7.57  | 0.044 |
| DDIT3        | 156 | 1 | 0.01 | -7.54  | 0.021 |
| MED20        | 201 | 1 | 0.01 | -7.49  | 0.008 |
| APLF         | 110 | 1 | 0.01 | -7.47  | 0.038 |
| TSPYL4       | 358 | 2 | 0.01 | -7.25  | 0     |
| CDK11B       | 119 | 1 | 0.01 | -7.13  | 0.049 |
| ZNF205-AS1   | 151 | 1 | 0.01 | -7.03  | 0.026 |
| LDHB         | 145 | 1 | 0.01 | -6.86  | 0.018 |
| NLRX1        | 158 | 1 | 0.01 | -6.76  | 0.032 |
| CYREN        | 148 | 1 | 0.01 | -6.64  | 0.042 |

|           |     |    |      |       |       |
|-----------|-----|----|------|-------|-------|
| CMSS1     | 256 | 3  | 0.01 | -6.52 | 0.004 |
| CYB5D1    | 361 | 4  | 0.01 | -6.51 | 0.049 |
| SLC36A1   | 196 | 2  | 0.01 | -6.49 | 0.009 |
| PIGC      | 182 | 2  | 0.01 | -6.43 | 0.02  |
| BAD       | 169 | 2  | 0.01 | -6.37 | 0.026 |
| NRP2      | 368 | 5  | 0.01 | -6.3  | 0.001 |
| STEAP2    | 189 | 2  | 0.01 | -6.27 | 0.018 |
| C1orf109  | 218 | 3  | 0.01 | -6.26 | 0.015 |
| ASNSD1    | 300 | 4  | 0.01 | -6.22 | 0.003 |
| LINC01554 | 170 | 2  | 0.01 | -6.21 | 0.039 |
| DHX33     | 228 | 3  | 0.01 | -6.08 | 0.012 |
| CIITA     | 213 | 3  | 0.02 | -6.01 | 0.034 |
| ST7-OT4   | 171 | 3  | 0.02 | -5.94 | 0.041 |
| BRCA1     | 214 | 4  | 0.02 | -5.92 | 0.017 |
| MBP       | 364 | 6  | 0.02 | -5.82 | 0.009 |
| RPAP3     | 816 | 15 | 0.02 | -5.78 | 0     |
| MTMR9     | 328 | 6  | 0.02 | -5.76 | 0.003 |
| C15orf40  | 212 | 4  | 0.02 | -5.73 | 0.017 |
| COLGALT2  | 172 | 3  | 0.02 | -5.69 | 0.042 |
| TSPAN33   | 320 | 6  | 0.02 | -5.65 | 0.008 |
| KIAA0753  | 198 | 4  | 0.02 | -5.59 | 0.022 |
| CDYL2     | 259 | 6  | 0.02 | -5.54 | 0.013 |
| ZNF81     | 150 | 3  | 0.02 | -5.51 | 0.032 |
| HSD17B7   | 262 | 6  | 0.02 | -5.37 | 0.017 |
| CPNE8     | 189 | 5  | 0.03 | -5.3  | 0.03  |
| TBC1D31   | 221 | 6  | 0.03 | -5.26 | 0.041 |
| NUDT16P1  | 221 | 6  | 0.03 | -5.16 | 0.028 |
| AMOT      | 222 | 6  | 0.03 | -5.1  | 0.027 |
| PMVK      | 216 | 6  | 0.03 | -5.08 | 0.031 |
| BBS10     | 621 | 19 | 0.03 | -5.06 | 0     |
| RMDN3     | 169 | 5  | 0.03 | -5.05 | 0.04  |
| AOC3      | 212 | 6  | 0.03 | -5.04 | 0.045 |
| NANP      | 177 | 5  | 0.03 | -5.02 | 0.044 |
| GORAB     | 360 | 11 | 0.03 | -5.01 | 0.006 |
| SLC25A33  | 166 | 5  | 0.03 | -4.97 | 0.034 |
| DNAH12    | 352 | 11 | 0.03 | -4.94 | 0.003 |
| KLHL2     | 974 | 34 | 0.03 | -4.84 | 0     |
| MIPEP     | 199 | 7  | 0.04 | -4.79 | 0.044 |
| SMDT1     | 192 | 7  | 0.04 | -4.7  | 0.04  |
| HDAC1     | 322 | 13 | 0.04 | -4.68 | 0.019 |
| GAN       | 276 | 12 | 0.04 | -4.56 | 0.044 |
| C12orf65  | 224 | 10 | 0.05 | -4.45 | 0.034 |
| CC2D2A    | 307 | 16 | 0.05 | -4.3  | 0.015 |
| HMGXB4    | 385 | 20 | 0.05 | -4.28 | 0.016 |
| SIRT3     | 274 | 15 | 0.05 | -4.23 | 0.043 |
| LIAS      | 216 | 12 | 0.05 | -4.22 | 0.04  |
| GTF2A2    | 317 | 17 | 0.05 | -4.22 | 0.023 |
| WDFY4     | 268 | 15 | 0.06 | -4.17 | 0.027 |
| ACSM1     | 317 | 18 | 0.06 | -4.15 | 0.032 |
| MTX2      | 360 | 21 | 0.06 | -4.11 | 0.007 |
| OARD1     | 252 | 15 | 0.06 | -4.1  | 0.042 |
| HSPB11    | 270 | 18 | 0.07 | -3.93 | 0.03  |
| IMPACT    | 495 | 35 | 0.07 | -3.82 | 0.003 |
| PPCS      | 483 | 36 | 0.07 | -3.74 | 0.007 |
| SNX4      | 663 | 53 | 0.08 | -3.65 | 0.004 |
| SP110     | 379 | 36 | 0.09 | -3.41 | 0.023 |
| FAM206A   | 244 | 23 | 0.1  | -3.39 | 0.041 |
| PPP4C     | 305 | 30 | 0.1  | -3.37 | 0.045 |
| ARHGAP21  | 512 | 53 | 0.1  | -3.26 | 0.008 |
| BTNL9     | 263 | 28 | 0.11 | -3.22 | 0.048 |
| NPEPPS    | 872 | 98 | 0.11 | -3.15 | 0.005 |

|          |     |     |      |       |       |
|----------|-----|-----|------|-------|-------|
| EPB41L2  | 528 | 60  | 0.11 | -3.13 | 0.036 |
| CXCL10   | 692 | 88  | 0.13 | -2.97 | 0.026 |
| PKD2     | 533 | 70  | 0.13 | -2.94 | 0.038 |
| BCL10    | 423 | 58  | 0.14 | -2.88 | 0.032 |
| POLR3GL  | 472 | 68  | 0.14 | -2.79 | 0.028 |
| DAD1     | 582 | 88  | 0.15 | -2.72 | 0.031 |
| SLC25A32 | 450 | 70  | 0.16 | -2.68 | 0.026 |
| PEX3     | 450 | 71  | 0.16 | -2.67 | 0.034 |
| COMMD10  | 780 | 125 | 0.16 | -2.65 | 0.024 |
| GOLT1B   | 466 | 78  | 0.17 | -2.58 | 0.04  |
| ATP6V0E1 | 782 | 136 | 0.17 | -2.53 | 0.015 |
| RPE      | 538 | 94  | 0.17 | -2.52 | 0.043 |
| ATMIN    | 579 | 102 | 0.18 | -2.51 | 0.041 |
| TADA1    | 513 | 92  | 0.18 | -2.48 | 0.027 |
| SNAP29   | 636 | 115 | 0.18 | -2.46 | 0.023 |
| NCK1     | 713 | 144 | 0.2  | -2.31 | 0.024 |
| LAMTOR5  | 681 | 138 | 0.2  | -2.3  | 0.029 |
| FBXL3    | 825 | 169 | 0.2  | -2.29 | 0.005 |
| FBXL17   | 460 | 95  | 0.21 | -2.27 | 0.04  |
| SUMO1    | 530 | 112 | 0.21 | -2.24 | 0.025 |
| DENND5A  | 587 | 125 | 0.21 | -2.24 | 0.024 |
| GALC     | 391 | 83  | 0.21 | -2.23 | 0.044 |
| UTP15    | 697 | 155 | 0.22 | -2.17 | 0.011 |
| AUH      | 410 | 94  | 0.23 | -2.13 | 0.034 |
| VPS37A   | 730 | 176 | 0.24 | -2.05 | 0.047 |

### Up-regulated genes in HCV positive non-tumor cells

n=137

p-value <0.05 LogFoldChange >2

| Gene id      | baseMeanA | baseMeanB | foldChange | pg2FoldChang | pval  |
|--------------|-----------|-----------|------------|--------------|-------|
| MYO19        | 0         | 511       | Inf        | Inf          | 0,001 |
| MUC13        | 0         | 428       | Inf        | Inf          | 0,002 |
| ENPP5        | 0         | 453       | Inf        | Inf          | 0,002 |
| DNPH1        | 0         | 425       | Inf        | Inf          | 0,003 |
| PRTG         | 0         | 412       | Inf        | Inf          | 0,004 |
| GPR18        | 0         | 371       | Inf        | Inf          | 0,004 |
| SLC35B1      | 0         | 505       | Inf        | Inf          | 0,007 |
| RNF121       | 0         | 336       | Inf        | Inf          | 0,008 |
| UTP14A       | 0         | 357       | Inf        | Inf          | 0,009 |
| TTC9         | 0         | 397       | Inf        | Inf          | 0,011 |
| ABCB6        | 0         | 428       | Inf        | Inf          | 0,011 |
| RASGRP1      | 0         | 307       | Inf        | Inf          | 0,012 |
| TAS2R19      | 0         | 511       | Inf        | Inf          | 0,014 |
| OSER1        | 0         | 290       | Inf        | Inf          | 0,017 |
| HEPHL1       | 0         | 263       | Inf        | Inf          | 0,021 |
| CCDC150      | 0         | 269       | Inf        | Inf          | 0,021 |
| MFSD2A       | 0         | 499       | Inf        | Inf          | 0,022 |
| RAB39B       | 0         | 267       | Inf        | Inf          | 0,023 |
| PRSS8        | 0         | 266       | Inf        | Inf          | 0,024 |
| CGAS         | 0         | 344       | Inf        | Inf          | 0,024 |
| NDUFB3       | 0         | 270       | Inf        | Inf          | 0,025 |
| CSTA         | 0         | 473       | Inf        | Inf          | 0,026 |
| ITPRIP       | 0         | 271       | Inf        | Inf          | 0,027 |
| HAUS4        | 0         | 443       | Inf        | Inf          | 0,027 |
| C12orf57     | 0         | 428       | Inf        | Inf          | 0,028 |
| CYP11A1      | 0         | 243       | Inf        | Inf          | 0,029 |
| DOCK4-AS1    | 0         | 376       | Inf        | Inf          | 0,030 |
| CNRIP1       | 0         | 321       | Inf        | Inf          | 0,032 |
| HEPACAM2     | 0         | 251       | Inf        | Inf          | 0,032 |
| LOC100131047 | 0         | 295       | Inf        | Inf          | 0,033 |



|           |   |     |         |            |       |
|-----------|---|-----|---------|------------|-------|
| LINC02471 | 0 | 281 | Inf     | Inf        | 0,034 |
| FANCI     | 0 | 277 | Inf     | Inf        | 0,035 |
| OR1J2     | 0 | 273 | Inf     | Inf        | 0,035 |
| SDR42E1   | 0 | 265 | Inf     | Inf        | 0,035 |
| NCBP2-AS2 | 0 | 624 | Inf     | Inf        | 0,035 |
| TNFSF8    | 0 | 256 | Inf     | Inf        | 0,036 |
| GPR174    | 0 | 251 | Inf     | Inf        | 0,036 |
| FHOD1     | 0 | 249 | Inf     | Inf        | 0,037 |
| OR51A4    | 0 | 235 | Inf     | Inf        | 0,037 |
| CBFA2T3   | 0 | 349 | Inf     | Inf        | 0,038 |
| LRCH2     | 0 | 233 | Inf     | Inf        | 0,038 |
| LINC00844 | 0 | 230 | Inf     | Inf        | 0,038 |
| PSKH1     | 0 | 227 | Inf     | Inf        | 0,038 |
| NOS2P3    | 0 | 226 | Inf     | Inf        | 0,038 |
| ARL2      | 0 | 223 | Inf     | Inf        | 0,038 |
| STAT5A    | 0 | 263 | Inf     | Inf        | 0,039 |
| IL18RAP   | 0 | 483 | Inf     | Inf        | 0,040 |
| IFNL4     | 0 | 220 | Inf     | Inf        | 0,040 |
| PGGT1B    | 0 | 218 | Inf     | Inf        | 0,041 |
| COPG2IT1  | 0 | 217 | Inf     | Inf        | 0,042 |
| LINC00526 | 0 | 429 | Inf     | Inf        | 0,042 |
| PFN1P2    | 0 | 370 | Inf     | Inf        | 0,043 |
| PDZD11    | 0 | 401 | Inf     | Inf        | 0,044 |
| NLRP14    | 0 | 214 | Inf     | Inf        | 0,044 |
| GOLGA6L9  | 0 | 214 | Inf     | Inf        | 0,044 |
| OR4C6     | 0 | 389 | Inf     | Inf        | 0,045 |
| PLD5      | 0 | 385 | Inf     | Inf        | 0,045 |
| TPCN2     | 0 | 212 | Inf     | Inf        | 0,045 |
| NETO2     | 0 | 374 | Inf     | Inf        | 0,046 |
| HTR3C     | 0 | 361 | Inf     | Inf        | 0,046 |
| DDX43     | 0 | 367 | Inf     | Inf        | 0,046 |
| LINC02535 | 0 | 359 | Inf     | Inf        | 0,046 |
| DDX47     | 0 | 337 | Inf     | Inf        | 0,047 |
| KLRA1P    | 0 | 208 | Inf     | Inf        | 0,048 |
| MIS18A    | 0 | 235 | Inf     | Inf        | 0,049 |
| MTX1      | 0 | 314 | Inf     | Inf        | 0,050 |
| TRIT1     | 0 | 557 | 1609,26 | 10,6521783 | 0,023 |
| TMEM254   | 0 | 535 | 1545,75 | 10,5940934 | 0,037 |
| GPC1      | 0 | 479 | 1385,03 | 10,4357019 | 0,038 |
| OTUB1     | 0 | 380 | 967,21  | 9,91768162 | 0,010 |
| GDF2      | 0 | 321 | 926,53  | 9,8556961  | 0,024 |
| NBPF12    | 0 | 350 | 890,38  | 9,79827653 | 0,029 |
| TAGAP     | 0 | 294 | 848,45  | 9,72868648 | 0,024 |
| SYT1      | 0 | 309 | 787,10  | 9,62040426 | 0,049 |
| VWA1      | 0 | 299 | 762,07  | 9,57377165 | 0,033 |
| ANO10     | 0 | 286 | 726,70  | 9,50522025 | 0,049 |
| SUCLA2    | 1 | 755 | 640,62  | 9,32332697 | 0,002 |
| IFT20     | 2 | 758 | 482,37  | 8,91400796 | 0,050 |
| TTC19     | 1 | 693 | 469,18  | 8,87399456 | 0,000 |
| ME1       | 1 | 475 | 438,13  | 8,77521552 | 0,006 |
| MUL1      | 1 | 426 | 361,53  | 8,49798809 | 0,009 |
| AGA       | 1 | 417 | 353,78  | 8,46669493 | 0,031 |
| GOLT1B    | 1 | 442 | 318,99  | 8,31735032 | 0,012 |
| WDHD1     | 1 | 360 | 305,09  | 8,25308605 | 0,041 |
| CCND2     | 2 | 457 | 291,01  | 8,18490495 | 0,009 |
| METT14    | 2 | 452 | 287,92  | 8,16953706 | 0,011 |
| STIM2     | 3 | 822 | 265,52  | 8,0526763  | 0,000 |
| ZNF354B   | 3 | 632 | 229,93  | 7,84502386 | 0,018 |
| KLHL42    | 1 | 288 | 201,42  | 7,65405611 | 0,046 |
| ATXN1L    | 3 | 529 | 195,79  | 7,61318702 | 0,006 |
| JAZF1     | 3 | 561 | 183,82  | 7,52211458 | 0,006 |

|          |     |      |        |            |       |
|----------|-----|------|--------|------------|-------|
| HDX      | 2   | 354  | 170,49 | 7,41356641 | 0,029 |
| UNC93B1  | 3   | 450  | 157,24 | 7,29683814 | 0,015 |
| TRPM8    | 4   | 520  | 142,58 | 7,15565794 | 0,007 |
| FBXO34   | 8   | 826  | 100,15 | 6,64607998 | 0,001 |
| ZNF766   | 5   | 483  | 99,69  | 6,63933648 | 0,028 |
| SFRP1    | 4   | 409  | 95,67  | 6,57998606 | 0,034 |
| COIL     | 5   | 418  | 78,60  | 6,2964074  | 0,029 |
| CDHR5    | 7   | 460  | 69,93  | 6,12787304 | 0,027 |
| STK38    | 9   | 574  | 63,43  | 5,98700499 | 0,012 |
| TRIM2    | 8   | 461  | 56,83  | 5,82866222 | 0,040 |
| HIF3A    | 17  | 727  | 42,90  | 5,42279739 | 0,008 |
| SMAD1    | 15  | 607  | 40,20  | 5,3291337  | 0,029 |
| SLC9B2   | 15  | 522  | 35,66  | 5,15604646 | 0,046 |
| IL33     | 15  | 516  | 34,66  | 5,11502287 | 0,042 |
| GSAP     | 49  | 1632 | 33,46  | 5,06452081 | 0,000 |
| MAN2A2   | 16  | 517  | 31,41  | 4,97315554 | 0,038 |
| FYB1     | 26  | 727  | 28,39  | 4,82743017 | 0,018 |
| MARVELD3 | 35  | 967  | 27,29  | 4,77035835 | 0,005 |
| C2orf69  | 26  | 683  | 26,67  | 4,7370402  | 0,025 |
| WDR48    | 27  | 650  | 24,37  | 4,60708664 | 0,033 |
| ZNF33B   | 29  | 640  | 21,98  | 4,45797758 | 0,037 |
| GAREM1   | 45  | 913  | 20,23  | 4,33825517 | 0,017 |
| RASSF4   | 62  | 1164 | 18,85  | 4,2361115  | 0,008 |
| SNX2     | 60  | 991  | 16,60  | 4,05341518 | 0,010 |
| ITGA6    | 71  | 1154 | 16,31  | 4,02801516 | 0,008 |
| MMRN1    | 58  | 864  | 14,98  | 3,90451054 | 0,034 |
| SIK3     | 64  | 818  | 12,84  | 3,68275945 | 0,035 |
| CLOCK    | 101 | 1170 | 11,54  | 3,52822335 | 0,011 |
| ATP11A   | 165 | 1854 | 11,25  | 3,49161695 | 0,003 |
| FAM160B1 | 178 | 1985 | 11,17  | 3,48091595 | 0,003 |
| TMOD3    | 125 | 1333 | 10,67  | 3,41496455 | 0,011 |
| RAB5C    | 105 | 1012 | 9,63   | 3,26681664 | 0,042 |
| IL7R     | 85  | 812  | 9,58   | 3,26071938 | 0,045 |
| CADM1    | 183 | 1659 | 9,05   | 3,17814903 | 0,009 |
| LIPA     | 341 | 2640 | 7,73   | 2,95120516 | 0,002 |
| MBTPS2   | 201 | 1423 | 7,09   | 2,82639707 | 0,037 |
| PPP1CC   | 198 | 1271 | 6,41   | 2,68095932 | 0,048 |
| SCOC     | 254 | 1503 | 5,92   | 2,56609971 | 0,020 |
| SNX4     | 327 | 1893 | 5,78   | 2,53201066 | 0,017 |
| NDUFA5   | 227 | 1257 | 5,55   | 2,47251363 | 0,037 |
| CHI3L1   | 549 | 2801 | 5,10   | 2,35054042 | 0,007 |
| DAZAP2   | 503 | 2283 | 4,54   | 2,1826241  | 0,047 |
| NOTCH2   | 414 | 1860 | 4,49   | 2,16624672 | 0,031 |
| MYO6     | 318 | 1401 | 4,41   | 2,14135539 | 0,049 |
| ARHGAP5  | 823 | 3476 | 4,22   | 2,07848702 | 0,006 |

### Down-regulated genes in HCV positive non-tumor cells

| n=65 p-value <0.05 LogFoldChange >2 |           |           |            |              |       |
|-------------------------------------|-----------|-----------|------------|--------------|-------|
| Gene id                             | baseMeanA | baseMeanB | foldChange | pg2FoldChang | pval  |
| FBXO7                               | 1212      | 265       | 0,22       | -2,1938995   | 0,047 |
| HECTD4                              | 1415      | 184       | 0,13       | -2,9433188   | 0,013 |
| SPEN                                | 1369      | 164       | 0,12       | -3,0604314   | 0,037 |
| CLK1                                | 1463      | 165       | 0,11       | -3,1454832   | 0,039 |
| VNN1                                | 1734      | 188       | 0,11       | -3,206192    | 0,037 |
| SEC23A                              | 1399      | 151       | 0,11       | -3,209344    | 0,033 |
| MSL2                                | 1090      | 103       | 0,09       | -3,4030123   | 0,020 |
| VAMP7                               | 1371      | 114       | 0,08       | -3,5926985   | 0,039 |
| ZNF217                              | 1040      | 79        | 0,08       | -3,7109491   | 0,017 |
| TNKS                                | 860       | 60        | 0,07       | -3,8319033   | 0,039 |

|           |     |    |      |            |       |
|-----------|-----|----|------|------------|-------|
| RANBP3L   | 763 | 43 | 0,06 | -4,1442161 | 0,028 |
| CRYBG3    | 809 | 33 | 0,04 | -4,6313005 | 0,020 |
| ABCF1     | 614 | 16 | 0,03 | -5,3034608 | 0,038 |
| CXorf40A  | 604 | 13 | 0,02 | -5,5769578 | 0,027 |
| ABCB10    | 904 | 18 | 0,02 | -5,6181014 | 0,007 |
| DHX38     | 590 | 11 | 0,02 | -5,6874768 | 0,032 |
| PRR11     | 550 | 11 | 0,02 | -5,6984878 | 0,026 |
| AP4E1     | 629 | 12 | 0,02 | -5,7333904 | 0,018 |
| AHSA2P    | 826 | 15 | 0,02 | -5,7366375 | 0,005 |
| TRIM66    | 534 | 9  | 0,02 | -5,8963905 | 0,024 |
| ZNF136    | 492 | 8  | 0,02 | -5,9922018 | 0,024 |
| RPE       | 653 | 10 | 0,02 | -6,0562283 | 0,016 |
| MDC1      | 516 | 7  | 0,01 | -6,2227114 | 0,018 |
| ZNF483    | 609 | 8  | 0,01 | -6,2239387 | 0,010 |
| KIAA0754  | 401 | 4  | 0,01 | -6,6231851 | 0,038 |
| SOX9      | 367 | 3  | 0,01 | -6,8190437 | 0,041 |
| WHAMMP2   | 382 | 3  | 0,01 | -6,8745109 | 0,034 |
| MGC27345  | 807 | 6  | 0,01 | -7,0458852 | 0,023 |
| DENND6A   | 397 | 3  | 0,01 | -7,1181953 | 0,040 |
| GAS5      | 318 | 2  | 0,01 | -7,6105441 | 0,048 |
| PXK       | 479 | 2  | 0,01 | -7,6187071 | 0,022 |
| SMARCD2   | 403 | 2  | 0,01 | -7,6287914 | 0,024 |
| BCL6      | 504 | 2  | 0,00 | -7,6819313 | 0,014 |
| COG6      | 381 | 2  | 0,00 | -7,8616653 | 0,036 |
| TRPS1     | 441 | 2  | 0,00 | -8,0826602 | 0,012 |
| TMED8     | 338 | 1  | 0,00 | -8,1099144 | 0,039 |
| POLR2K    | 404 | 1  | 0,00 | -8,3698396 | 0,018 |
| NYNRIN    | 559 | 2  | 0,00 | -8,4249826 | 0,043 |
| HCCS      | 434 | 1  | 0,00 | -8,4659793 | 0,018 |
| CYP1A1    | 336 | 1  | 0,00 | -8,69251   | 0,029 |
| RBX1      | 325 | 0  | 0,00 | -9,6327698 | 0,034 |
| AP5B1     | 344 | 0  | 0,00 | -9,7163261 | 0,027 |
| GALK2     | 424 | 0  | 0,00 | -10,017367 | 0,010 |
| ANKRD46   | 606 | 0  | 0,00 | "-inf"     | 0,001 |
| UBE2E3    | 453 | 0  | 0,00 | "-inf"     | 0,004 |
| SLC5A9    | 361 | 0  | 0,00 | "-inf"     | 0,013 |
| KDM8      | 336 | 0  | 0,00 | "-inf"     | 0,018 |
| ISG20     | 322 | 0  | 0,00 | "-inf"     | 0,021 |
| TPX2      | 323 | 0  | 0,00 | "-inf"     | 0,021 |
| ATF1      | 312 | 0  | 0,00 | "-inf"     | 0,024 |
| LINC02338 | 311 | 0  | 0,00 | "-inf"     | 0,024 |
| ZNF441    | 366 | 0  | 0,00 | "-inf"     | 0,026 |
| SIGLEC9   | 304 | 0  | 0,00 | "-inf"     | 0,027 |
| PARG      | 303 | 0  | 0,00 | "-inf"     | 0,027 |
| CHMP6     | 297 | 0  | 0,00 | "-inf"     | 0,029 |
| STAT4     | 288 | 0  | 0,00 | "-inf"     | 0,032 |
| GET4      | 288 | 0  | 0,00 | "-inf"     | 0,033 |
| TIMM9     | 288 | 0  | 0,00 | "-inf"     | 0,033 |
| NDUFAF8   | 283 | 0  | 0,00 | "-inf"     | 0,034 |
| FAM174A   | 278 | 0  | 0,00 | "-inf"     | 0,037 |
| MOCOS     | 276 | 0  | 0,00 | "-inf"     | 0,039 |
| GPR37     | 295 | 0  | 0,00 | "-inf"     | 0,044 |
| GARNL3    | 265 | 0  | 0,00 | "-inf"     | 0,045 |
| INPP5F    | 257 | 0  | 0,00 | "-inf"     | 0,049 |

**Supplementary Table S3- Gene Ontology Analysis (DAVID)**

| Non Tumor HCV+ vs HCV- |                                                         |       |      |          |       |
|------------------------|---------------------------------------------------------|-------|------|----------|-------|
| Category               | Term                                                    | Count | %    | P-Value  | Fold  |
| GOTERM CC DIRECT       | Golgi membrane                                          | 12    | 9    | 1,50E-03 | 3,1   |
| GOTERM CC DIRECT       | integral component of membrane                          | 45    | 33,8 | 1,80E-02 | 1,3   |
| GOTERM BP DIRECT       | centrosome organization                                 | 3     | 2,3  | 1,90E-02 | 14,1  |
| GOTERM MF DIRECT       | leptin receptor binding                                 | 2     | 1,5  | 2,00E-02 | 100,5 |
| GOTERM BP DIRECT       | skin development                                        | 3     | 2,3  | 2,00E-02 | 13,7  |
| GOTERM CC DIRECT       | intracellular                                           | 16    | 12   | 2,30E-02 | 1,9   |
| GOTERM BP DIRECT       | ion transmembrane transport                             | 5     | 3,8  | 4,50E-02 | 3,7   |
| GOTERM CC DIRECT       | MLL5-L complex                                          | 2     | 1,5  | 5,00E-02 | 38,6  |
| GOTERM MF DIRECT       | transferrin receptor binding                            | 2     | 1,5  | 5,10E-02 | 37,7  |
| GOTERM BP DIRECT       | cartilage development                                   | 3     | 2,3  | 5,40E-02 | 7,9   |
| GOTERM CC DIRECT       | endosome                                                | 5     | 3,8  | 5,70E-02 | 3,4   |
| GOTERM CC DIRECT       | cell-cell adherens junction                             | 6     | 4,5  | 5,70E-02 | 2,9   |
| GOTERM CC DIRECT       | lysosome                                                | 5     | 3,8  | 5,80E-02 | 3,4   |
| GOTERM MF DIRECT       | identical protein binding                               | 10    | 7,5  | 5,80E-02 | 2     |
| GOTERM BP DIRECT       | protein deglycosylation                                 | 2     | 1,5  | 6,20E-02 | 31,1  |
| GOTERM BP DIRECT       | positive regulation of T cell differentiation in thymus | 2     | 1,5  | 6,20E-02 | 31,1  |
| GOTERM BP DIRECT       | succinate metabolic process                             | 2     | 1,5  | 6,20E-02 | 31,1  |
| GOTERM CC DIRECT       | mitochondrial outer membrane                            | 4     | 3    | 7,10E-02 | 4,1   |
| GOTERM BP DIRECT       | cell division                                           | 6     | 4,5  | 7,30E-02 | 2,7   |
| GOTERM BP DIRECT       | cellular response to interleukin-1                      | 3     | 2,3  | 7,50E-02 | 6,6   |
| GOTERM BP DIRECT       | homeostasis of number of cells                          | 2     | 1,5  | 8,00E-02 | 23,9  |
| GOTERM CC DIRECT       | plasma membrane                                         | 34    | 25,6 | 9,20E-02 | 1,3   |
| GOTERM BP DIRECT       | positive regulation of cartilage development            | 2     | 1,5  | 9,70E-02 | 19,4  |

| Tumors HCV+ vs HCV- |                                                          |       |      |          |      |
|---------------------|----------------------------------------------------------|-------|------|----------|------|
| Category            | Term                                                     | Count | %    | P-Value  | Fold |
| GOTERM MF DIRECT    | metal ion binding                                        | 19    | 20,4 | 1,10E-03 | 2,2  |
| GOTERM MF DIRECT    | DNA binding                                              | 15    | 16,1 | 6,20E-03 | 2,2  |
| GOTERM BP DIRECT    | transcription, DNA-templated                             | 16    | 17,2 | 1,40E-02 | 1,9  |
| GOTERM BP DIRECT    | regulation of cell shape                                 | 4     | 4,3  | 2,10E-02 | 6,8  |
| GOTERM BP DIRECT    | regulation of transcription, DNA-templated               | 13    | 14   | 2,10E-02 | 2    |
| GOTERM MF DIRECT    | transcription factor activity, sequence-specific DNA bin | 9     | 9,7  | 3,90E-02 | 2,3  |
| GOTERM BP DIRECT    | endothelial cell morphogenesis                           | 2     | 2,2  | 4,50E-02 | 43   |
| GOTERM BP DIRECT    | regulation of synaptic transmission, GABAergic           | 2     | 2,2  | 4,90E-02 | 39,4 |
| GOTERM BP DIRECT    | fatty acid oxidation                                     | 2     | 2,2  | 5,70E-02 | 33,8 |
| GOTERM BP DIRECT    | lipoprotein transport                                    | 2     | 2,2  | 6,10E-02 | 31,5 |
| GOTERM BP DIRECT    | glucose homeostasis                                      | 3     | 3,2  | 6,60E-02 | 7    |
| GOTERM BP DIRECT    | male meiosis                                             | 2     | 2,2  | 8,80E-02 | 21,5 |
| GOTERM MF DIRECT    | metalloaminopeptidase activity                           | 2     | 2,2  | 8,90E-02 | 21,3 |
| GOTERM BP DIRECT    | negative regulation of cell growth                       | 3     | 3,2  | 9,10E-02 | 5,9  |
